# Supplementary material for: Construction of a S-scheme CdS/CuFe2O4 heterojunction with suppressed charge recombination for enhanced visible light-driven photocatalytic activity
Source: Royal Society of Chemistry journal article supplement (doi:10.1039/d2nj05616j), 2023-01-01
Supplement: d2nj05616j1.pdf [file d2nj05616j1.pdf]

**Construction of S-scheme CdS/CuFe<sub>2</sub>O<sub>4</sub> heterojunction with suppressed charge recombination  
for enhanced visible light driven photocatalytic activity**

C. Akshhayya<sup>a</sup>, Mohammad Omaish Ansari<sup>b</sup>, B. Janani<sup>c</sup>, V. Subhiksha<sup>a</sup>, Ammar A. Melaibari<sup>b,d</sup>,  
P.M.Z. Hasan<sup>b</sup>, Mohammad Asad<sup>e,f</sup>, S. Sudheer Khan<sup>g,\*</sup>

<sup>a</sup>Nanobiotechnology Laboratory, Department of Biotechnology, Bannari Amman Institute of  
Technology, Sathyamangalam, Tamil Nadu, India

<sup>b</sup>Center of Nanotechnology, King Abdulaziz University, Jeddah 21589, Saudi Arabia

<sup>c</sup>Nano-imaging and Spectroscopy Laboratory, Faculty of Science, University of Ontario Institute of  
Technology, 2000 Simcoe Street North, Oshawa ON L1G 0C5, Canada

<sup>d</sup>Department of Mechanical Engineering, Faculty of Engineering, King Abdulaziz University, Jeddah  
21589, Saudi Arabia

<sup>e</sup>Center of Excellence for Advanced Materials Research (CEAMR), King Abdulaziz University, P.O.  
Box 80203, Jeddah 21589, Saudi Arabia

<sup>f</sup>Chemistry Department, Faculty of Science, King Abdulaziz University, P.O. Box 80203, Jeddah  
21589, Saudi Arabia

<sup>g</sup>Department of Oral Medicine and Radiology, Saveetha Dental College and Hospitals, Saveetha  
Institute of Medical and Technical Sciences (SIMATS), Chennai- 600077, Tamil Nadu, India.

\*Corresponding author

Dr. S. Sudheer Khan

Email: [sudheerkhans.sdc@saveetha.com](mailto:sudheerkhans.sdc@saveetha.com)

## **Text S1.**

### **Characterization of nanoparticles**

XRD analysis (Bruker D8 Advance) was carried out to study the crystalline nature of fabricated CuFe<sub>2</sub>O<sub>4</sub>/CdS NCs in the 2θ range of 10 to 90° using Cu-Kα radiation ( $\lambda = 1.54178 \text{ \AA}$ ). TEM was carried out to examine the morphology of fabricated nanomaterial using Jeol/JEM 2100. EDAX analysis was done to confirm the presence of elements in the NCs. FTIR of the fabricated NCs was acquired from the Thermo Fisher scientific Nicolet IS50 instrument. The specific surface area of the sample was detected by BET analysis (Quantachrome instrument, Autosorb IQ series). In order to detect the chemical composition and oxidation states of the fabricated NCs, XPS analysis was done using Thermo Scientific™ ESCALAB™ Xi+. UV-vis DRS was done using Perkin-Elmer Lambda 750. Raman spectroscopic studies (WiTec alpha 300, Germany) were done in order to determine the vibrational modes of NCs. EIS (Metrohm Autolab Potentiostat) was carried out to confirm the effective separation and migration of e<sup>-</sup>/h<sup>+</sup> pairs. Photoluminescence spectroscopy (FLS 1000, Edinburgh Instruments) was carried out to obtain the PL spectra of the fabricated NCs.



**Figure S2.** EDAX of CuFe<sub>2</sub>O<sub>4</sub>/CdS NCs- 40

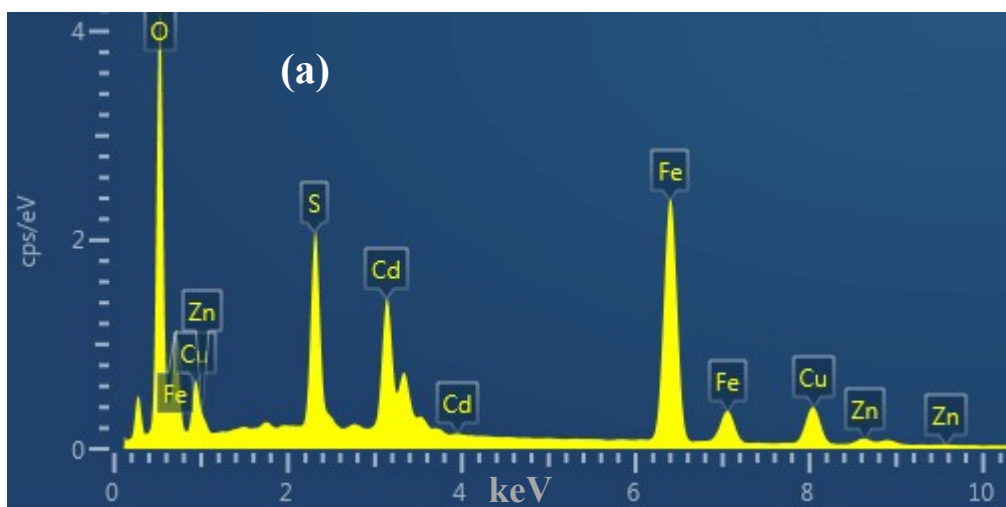

Figure S3. (a) ESR, (b) EIS and (c) BET analysis.

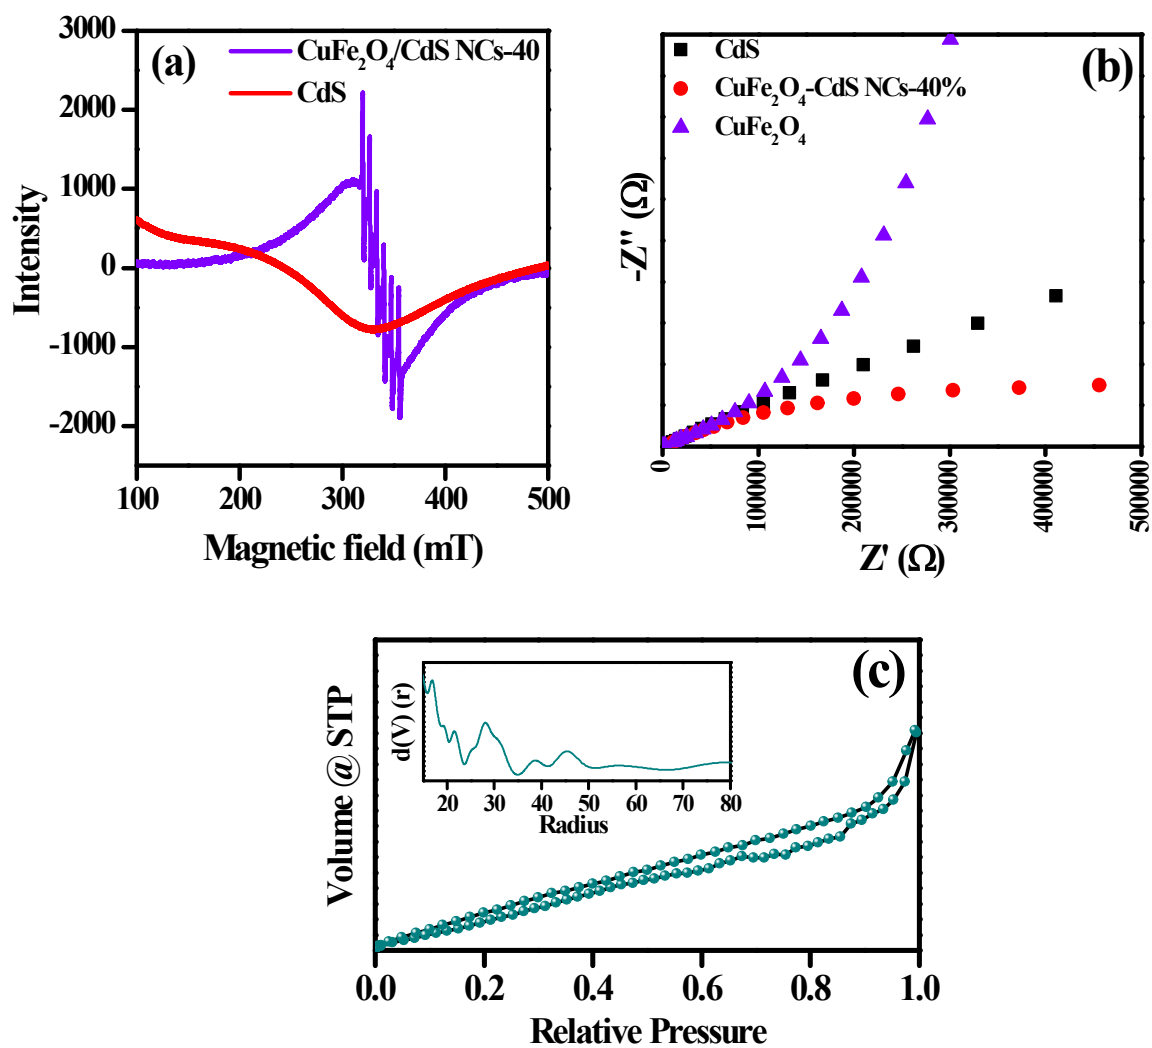

**Figure S4.** Plot of  $C/C_0$  and  $1-C/C_0$  vs time. (a)  $\text{CuFe}_2\text{O}_4/\text{CdS}$  NCs -20, (b)  $\text{CuFe}_2\text{O}_4/\text{CdS}$  NCs -60, (c)  $\text{CuFe}_2\text{O}_4$  and (d) CdS.

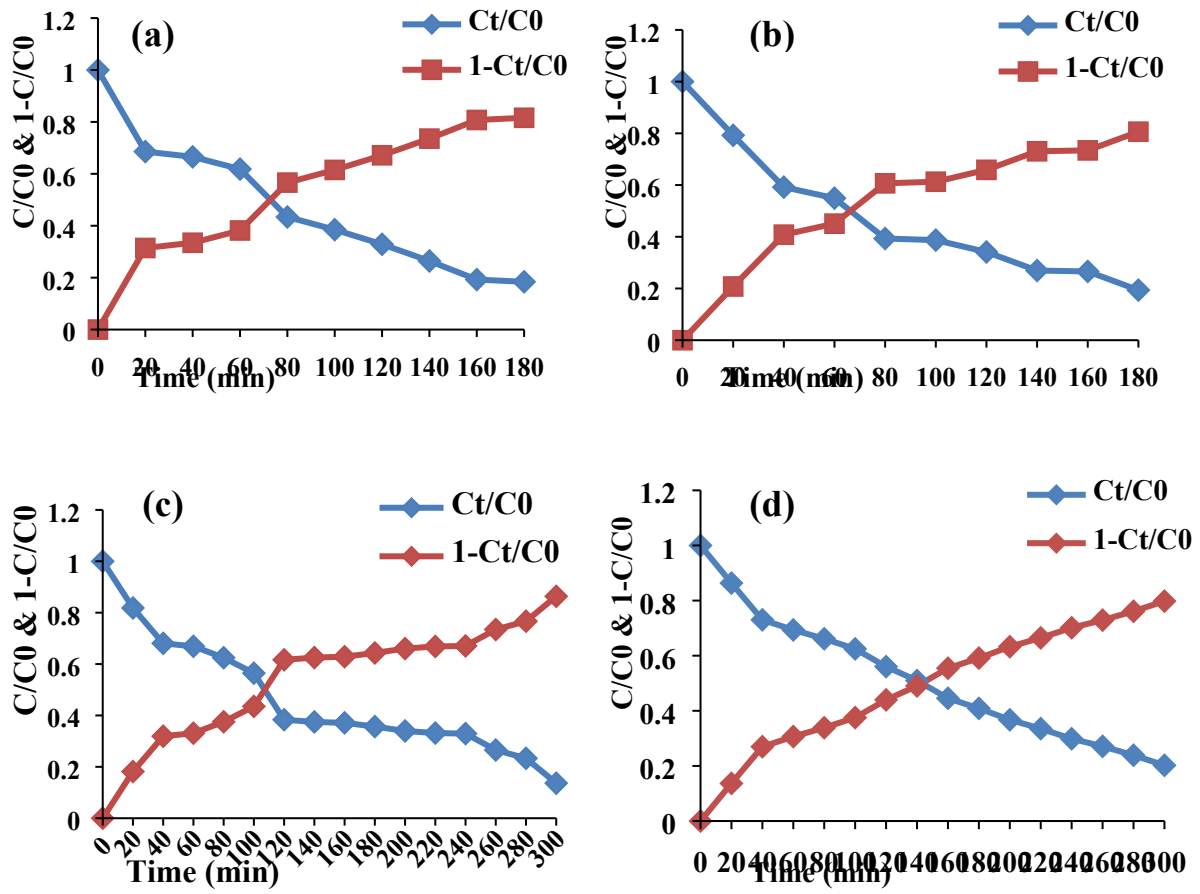

**Figure S5.** XPS spectra of reused CuFe<sub>2</sub>O<sub>4</sub>/CdS NCs-40.

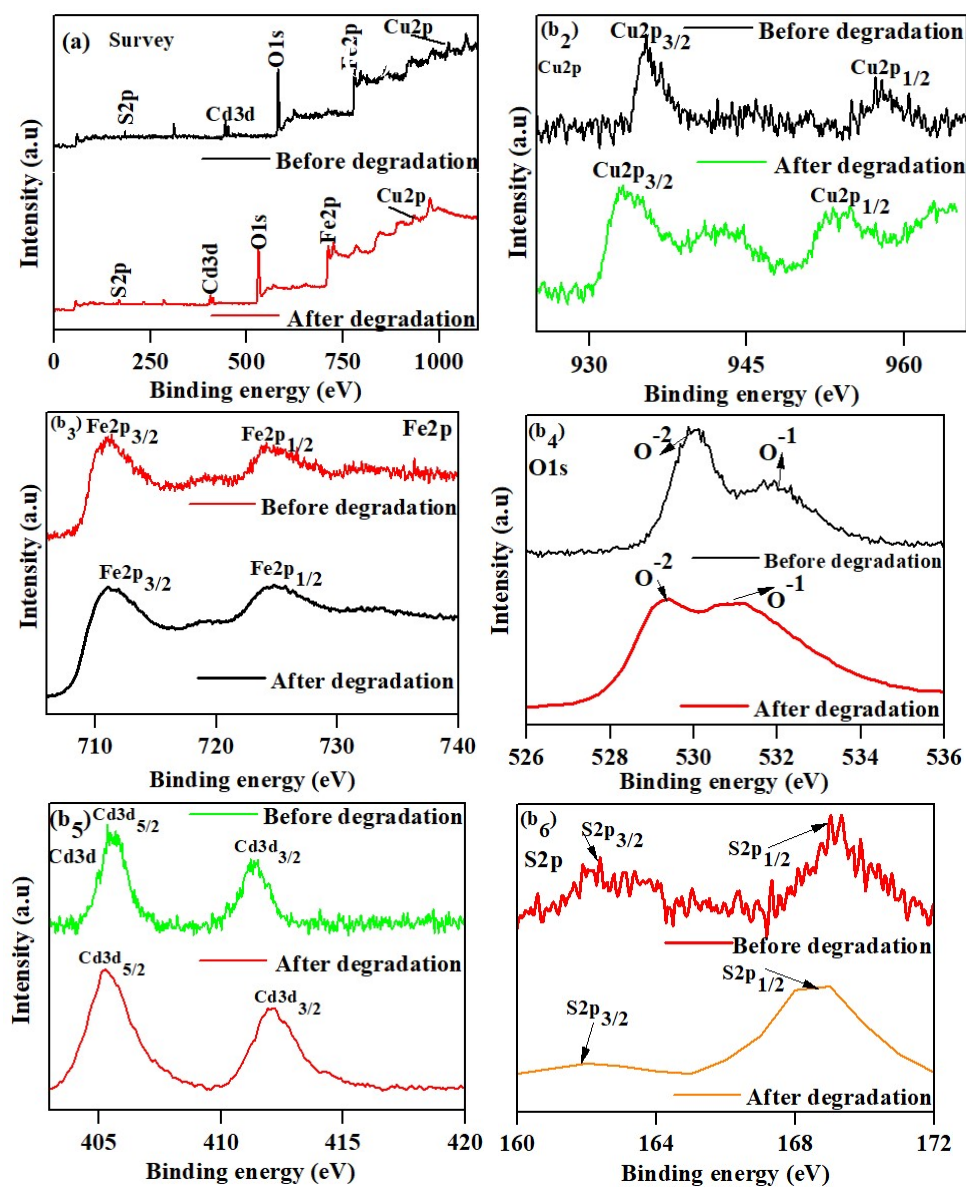

**Table S1.** Comparative data on photocatalysis of present work with available literature.

| <b>Particle</b>                                                                                              | <b>Photocatalytic activity (%)</b> | <b>Photocatalyst dosage (mg/L)</b> | <b>Pollutant concentration</b> | <b>References</b> |
|--------------------------------------------------------------------------------------------------------------|------------------------------------|------------------------------------|--------------------------------|-------------------|
| CeO <sub>2</sub> /CdS                                                                                        | 88.07                              | 1000                               | 12 mg/L                        | [47]              |
| FeSe                                                                                                         | 88.00                              | 500                                | 6 μM                           | [48]              |
| CuFe <sub>2</sub> O <sub>4</sub> (UV light)                                                                  | 94.20                              | 240                                | 20 mg/L                        | [49]              |
| CuFe <sub>2</sub> O <sub>4</sub> /Bi <sub>2</sub> O <sub>3</sub> (with H <sub>2</sub> O <sub>2</sub> )       | 91.00                              | 2400                               | 7 mg/L                         | [50]              |
| CuFe <sub>2</sub> O <sub>4</sub> /C <sub>3</sub> N <sub>4</sub> hybrid (with H <sub>2</sub> O <sub>2</sub> ) | 98.00                              | 1000                               | 0.028 mM                       | [51]              |
| CuFe <sub>2</sub> O <sub>4</sub> /CdS NCs-40                                                                 | 90.06                              | 150                                | 25 mg/L                        | Present work      |
